# Supplementary material for: Multi-functional modification of nickel-rich lithium cathode materials using Na2PO3F
Source: Royal Society of Chemistry journal article supplement (doi:10.1039/d2ta01850k), 2022-01-01
Supplement: d2ta01850k1.pdf [file d2ta01850k1.pdf]

## Supporting Information

### Multi-functional modification of nickel-rich lithium cathode materials using $\text{Na}_2\text{PO}_3\text{F}$

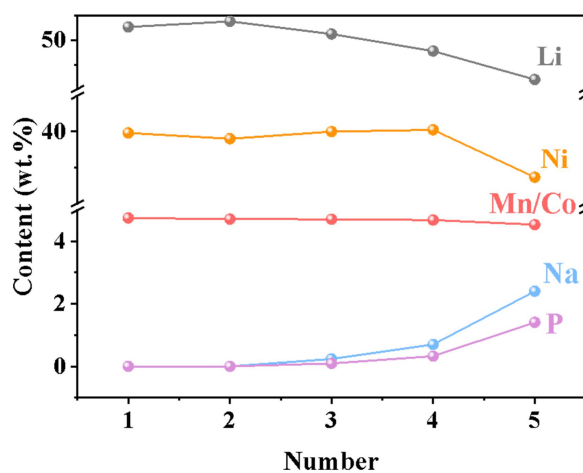

**Fig.S1** Components of NCM sample. ICP-OES of samples before cycle and 1, 2, 3, 4 and 5 corresponding to NCM-0, NCM-0.05, NCM-0.33, NCM-1 and NCM-3, respectively.

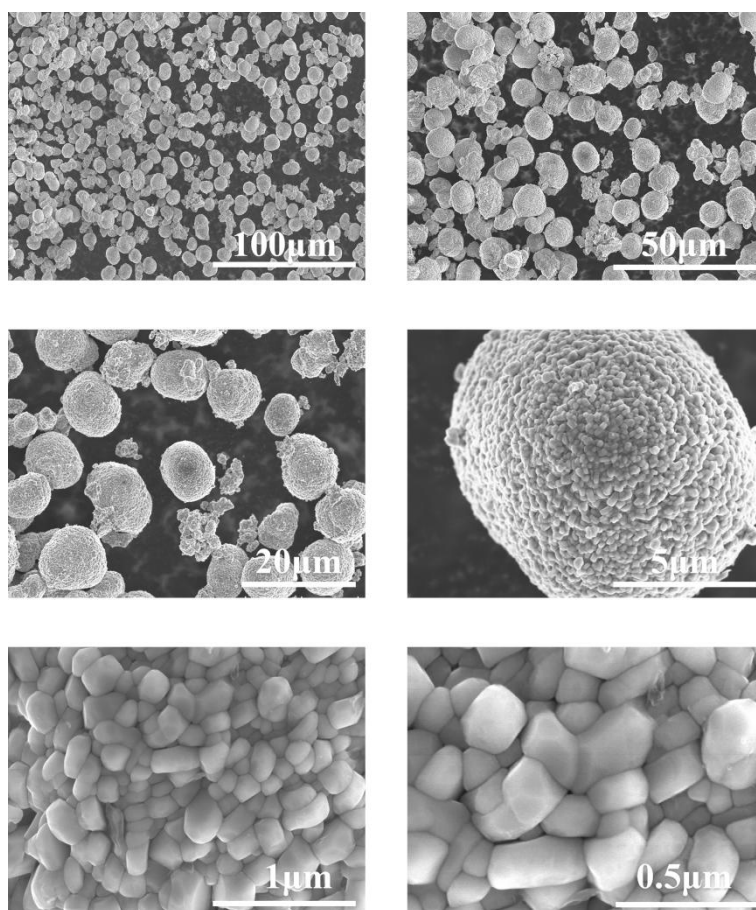

**Fig.S2** Morphology characterizations of NCM-0. SEM image of NCM-0 in different magnification and corresponding to 500 ×, 1 k×, 2 k×, 10 k×, 50 k×, 100 k×, respectively.

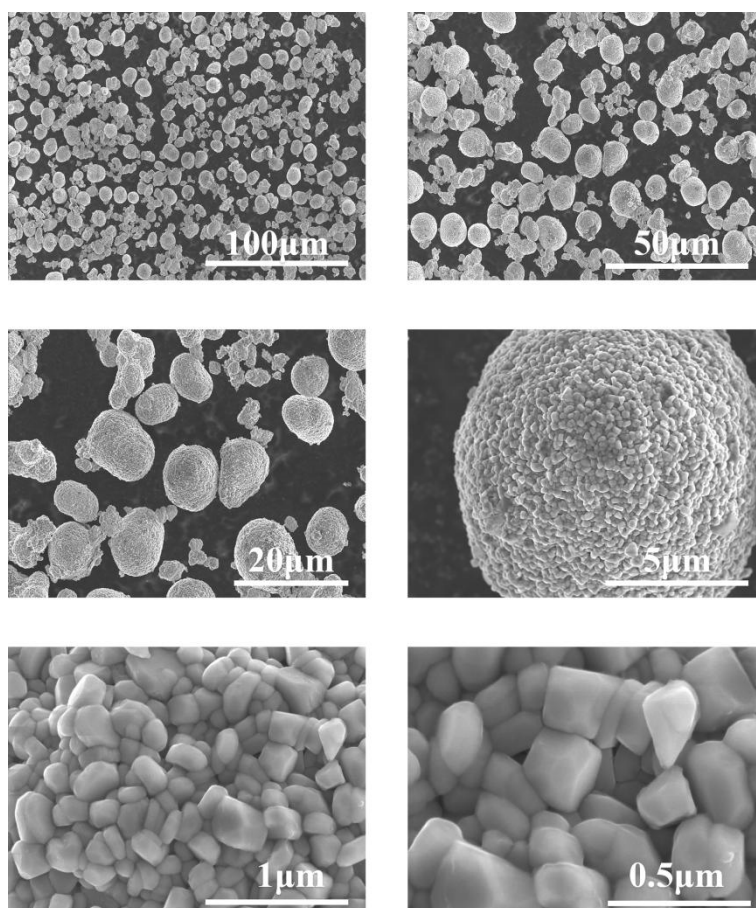

**Fig.S3** Morphology characterizations of NCM-0.05. SEM image of NCM-0.05 in different magnification and corresponding to 500 ×, 1 k×, 2 k×, 10 k×, 50 k×, 100 k×, respectively.

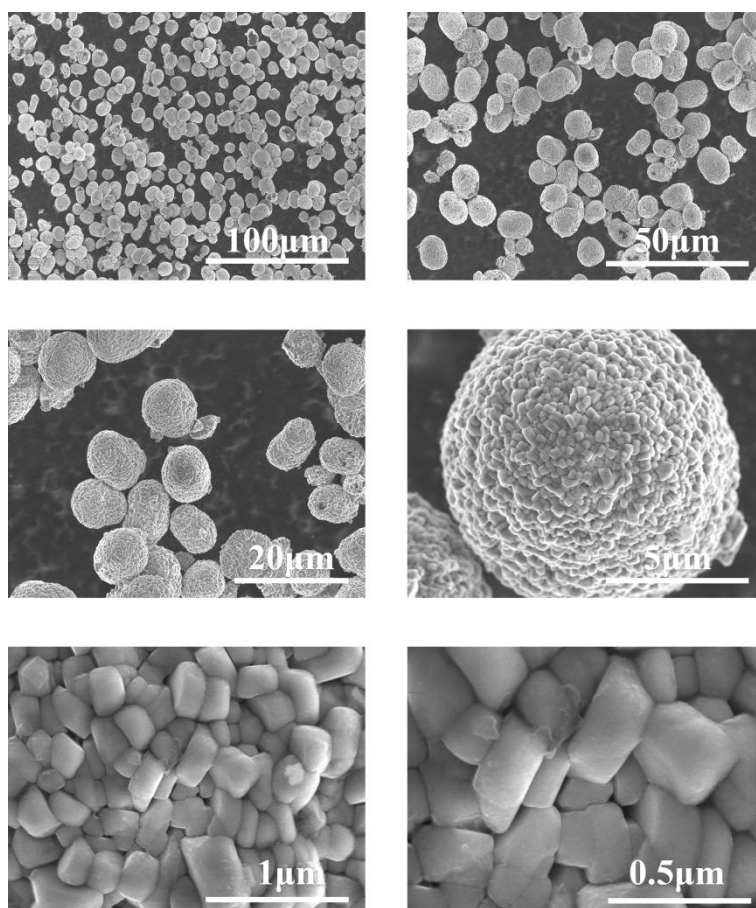

**Fig.S4** Morphology characterizations of NCM-0.33. SEM image of NCM-0.33 in different magnification and corresponding to 500  $\times$ , 1 k $\times$ , 2 k $\times$ , 10 k $\times$ , 50 k $\times$ , 100 k $\times$ , respectively.

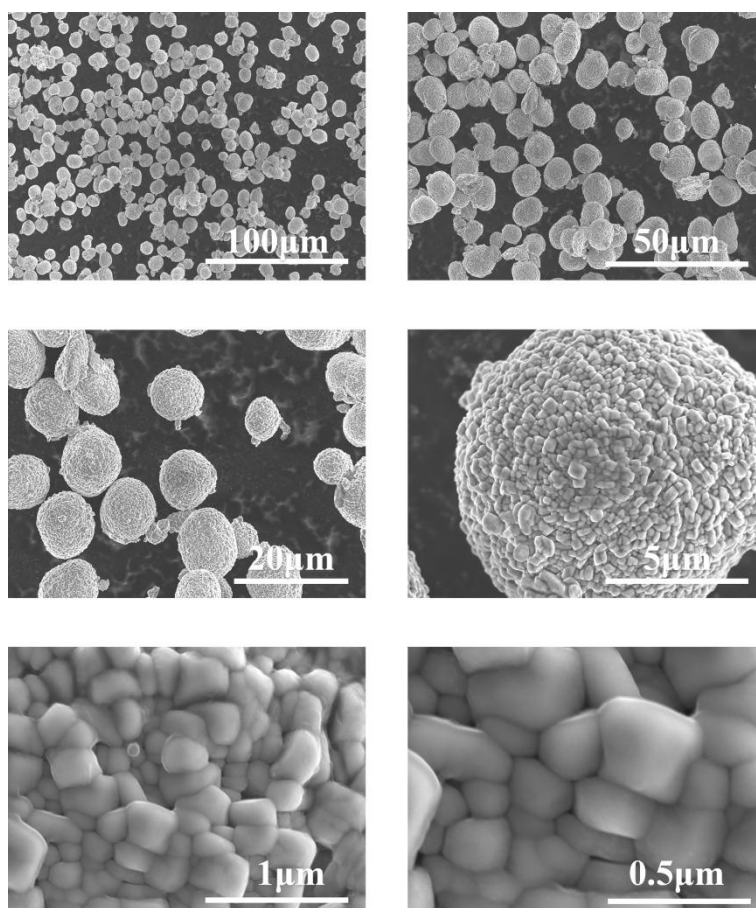

**Fig.S5** Morphology characterizations of NCM-1. SEM image of NCM-1 in different magnification and corresponding to 500 ×, 1 k×, 2 k×, 10 k×, 50 k×, 100 k×, respectively.

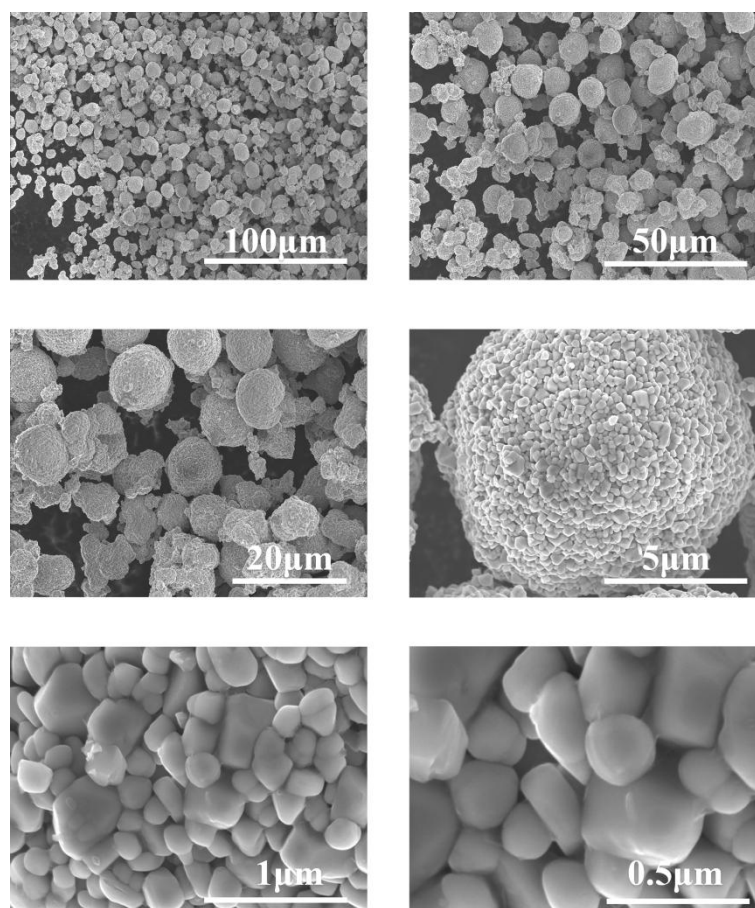

**Fig.S6** Morphology characterizations of NCM-3. SEM image of NCM-3 in different magnification and corresponding to 500  $\times$ , 1 k $\times$ , 2 k $\times$ , 10 k $\times$ , 50 k $\times$ , 100 k $\times$ , respectively.

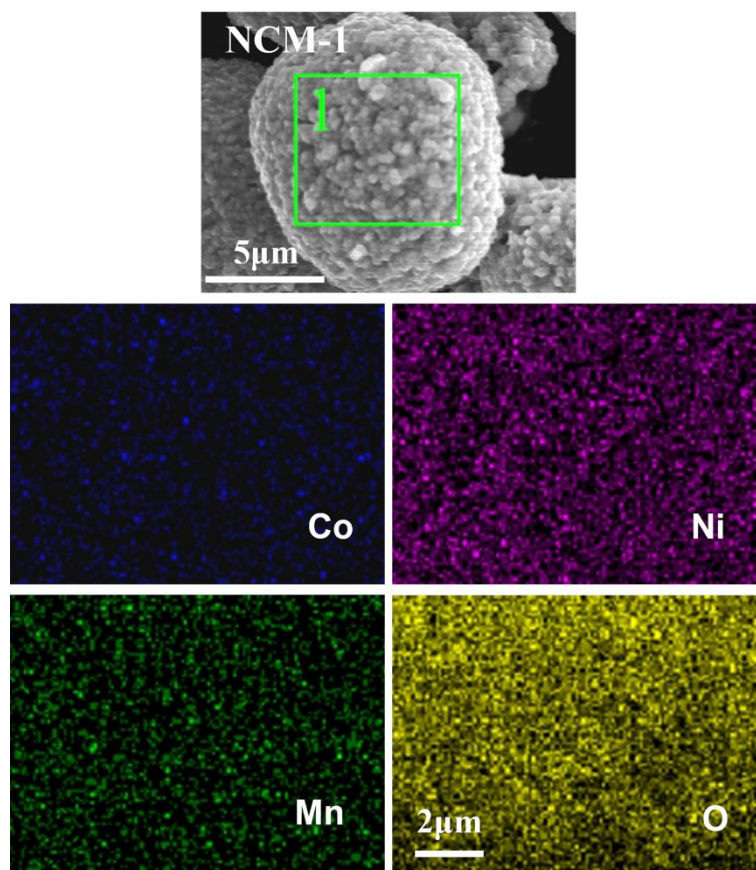

**Fig.S7** Morphology characterizations of NCM-1. EDS mapping of NCM-1 and the Co, Ni, Mn and O elements were evenly distributed.



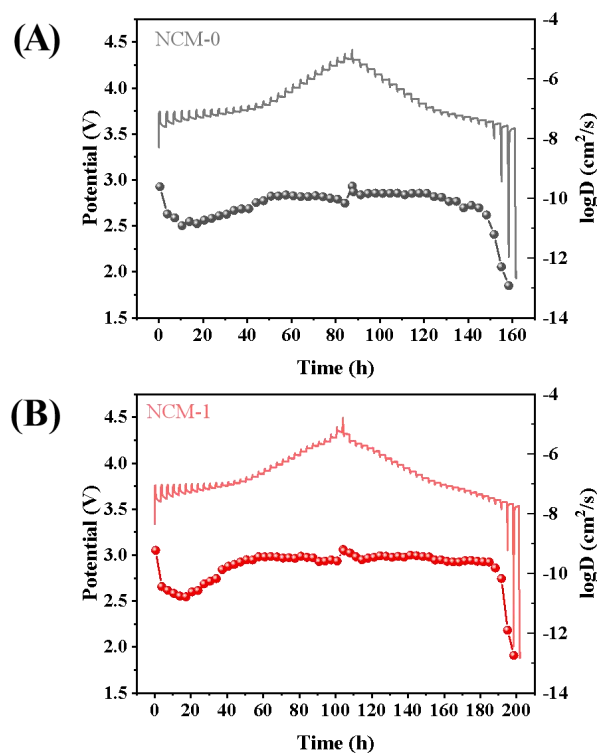

**Fig.S8** Electrochemical Performance characterizations. Charge/discharge curves of GITT at initial cycle for (A) NCM-0 and (B) NCM-1 in the range of 2.8-4.4 V (vs. Li<sup>+</sup>/Li) at 25 °C. GITT measurements were conducted in a titration step at 0.08 C of 30 min and a relaxation step of 3 h.

The  $D_{Li^+}$  can be calculated by the Fick's second law through Equation (1):<sup>1</sup>

$$D_{Li^+} = \frac{4}{\pi\tau} \left( \frac{m_B V_M}{M_B S} \right)^2 \left( \frac{\Delta E_s}{\Delta E_t} \right)^2 \quad (1)$$

Where the  $\tau$  is the relaxation time ( $\tau = 1800$  s),  $m_B$  is the weight of the active material of electrode material,  $V_M$  is the molar volume of electrode material,  $M_B$  is the molar mass of the active material of electrode material ( $M_B = 97.5$  g mol<sup>-1</sup>),  $S$  is the contact area of electrode material with electrolyte ( $S = 1.131$  cm<sup>2</sup>),  $\Delta E_s$  is the voltage change caused by the pulse, and  $\Delta E_t$  is the constant current charge/discharge voltage change.

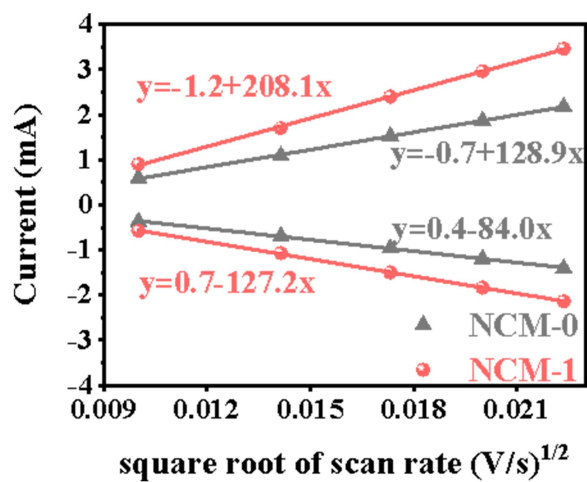

**Fig.S9** CV curves of NCM-0 and NCM-1. The lines plot of cathodic/anodic peak current densities with the square root of scan rate.

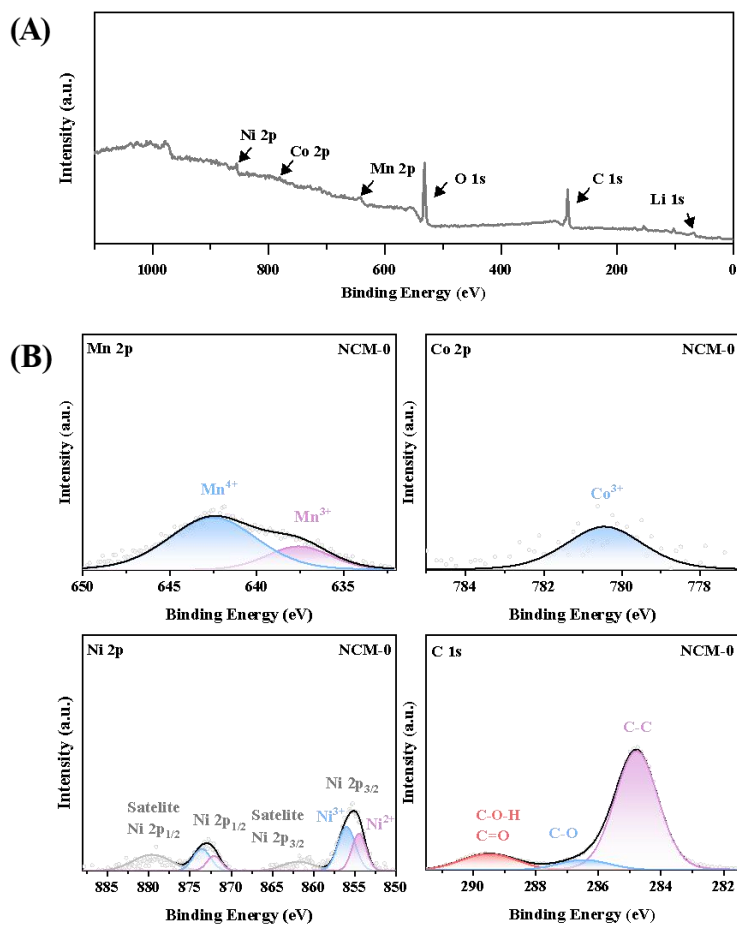

**Fig.S10** Surface composition characterization of NCM-0. (A) XPS full spectrum of NCM-0. (B) XPS spectra of Mn 2p, Co 2p, Ni 2p and C 1s for NCM-0.

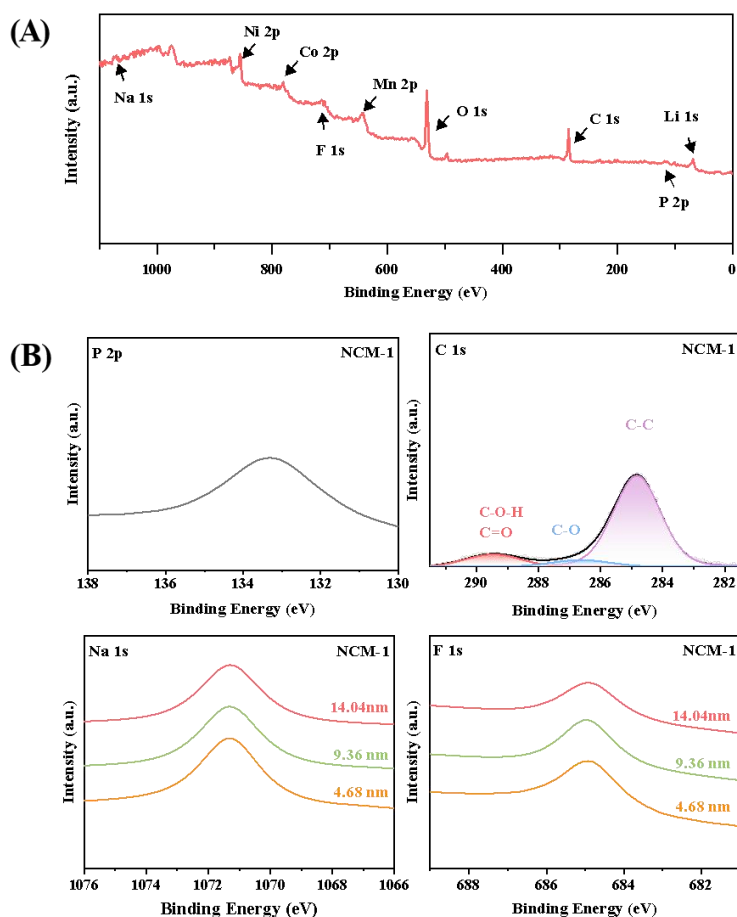

**Fig.S11** Surface composition characterization of NCM-1. (A) XPS full spectrum of NCM-1. (B) XPS spectra of P 2p and C 1s for NCM-1, also the deep profile curve of Na and F in the surface of NCM-1. The binding energy of 1070-1072 eV were corresponding to Na-O and Na-F, and the binding energy of 684-686 eV were corresponding to Li-F, TM-F and Na-F, with the binding energy of 132-135 eV were corresponding to Li-O-P.

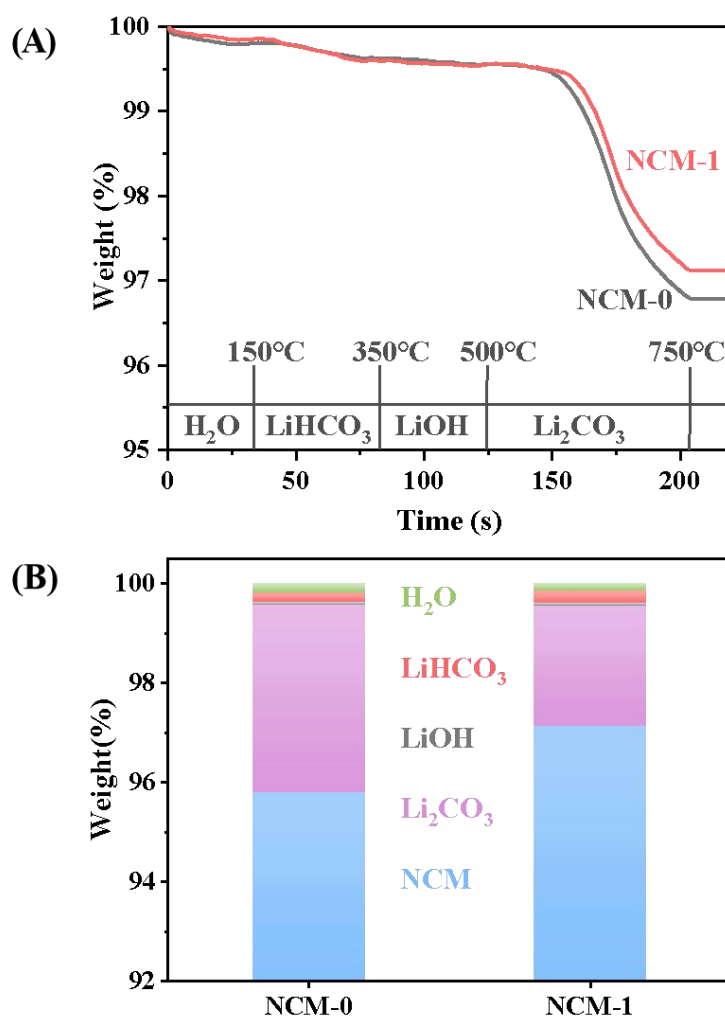

**Fig.S12** Surface composition of NCM-0 and NCM-1. (A) TGA test and (B) the content of the material decomposition during each pyrolysis process: (i) Adsorbed water should be highly unstable at 150 °C and is expected to evaporate from the sample relatively quickly. (ii) Lithium bicarbonate and adsorbed carbonate species on positive electrode materials will decompose at 350 °C. (iii) LiOH is thermally degraded at 410-450 °C and Li<sub>2</sub>CO<sub>3</sub> is evolved at 710-750 °C.<sup>2</sup>

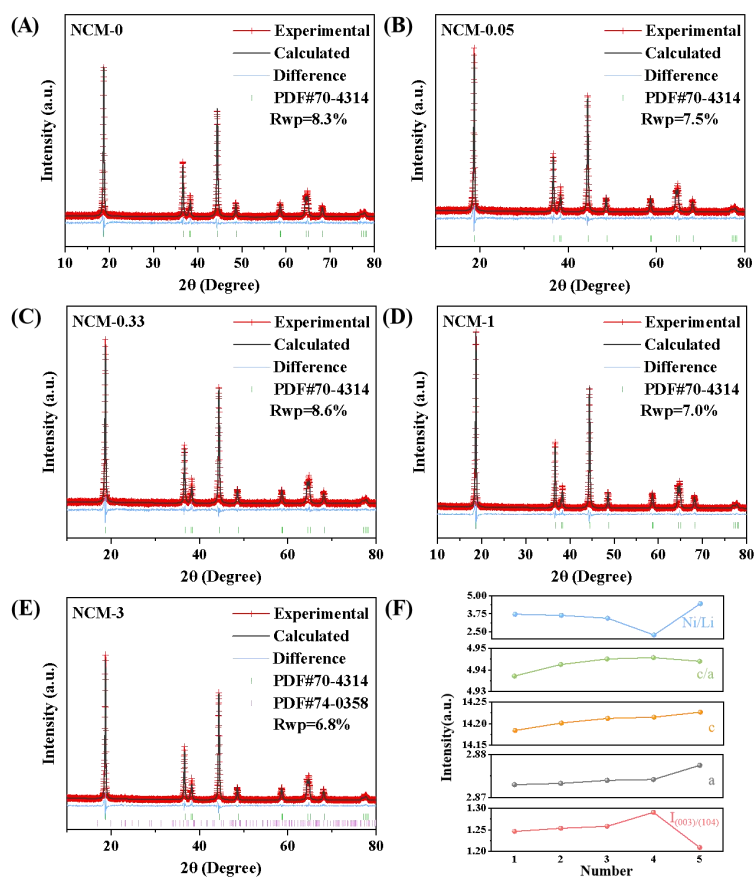

**Fig.S13** Structural characterization of five sample. XRD patterns of (A) NCM-0, (B) NCM-0.05, (C) NCM-0.33, (D) NCM-1 and (E) NCM-3 with refined XRD data analysis. (F) The lattice parameters of all samples.

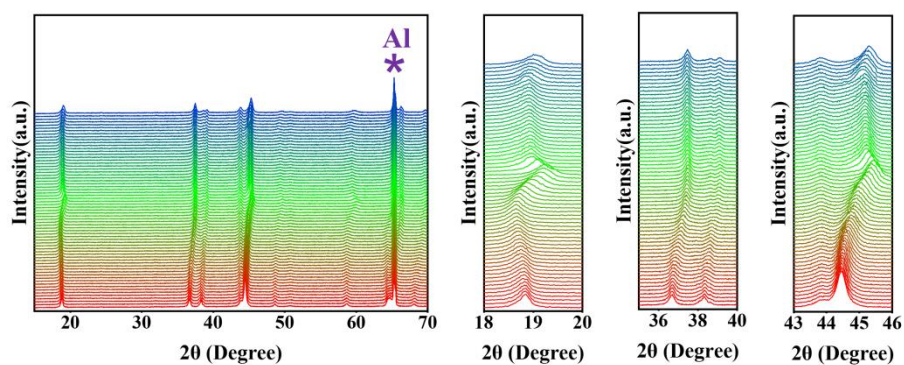

**Fig.S14** Structural evolution of NCM-0. In-situ XRD for NCM-0 cathode during the first charge-discharge cycle between 2.8-4.4 V (vs.  $\text{Li}^+/\text{Li}$ ) at 0.08 C. The peak corresponding to the \* was the signal of the basal Al.

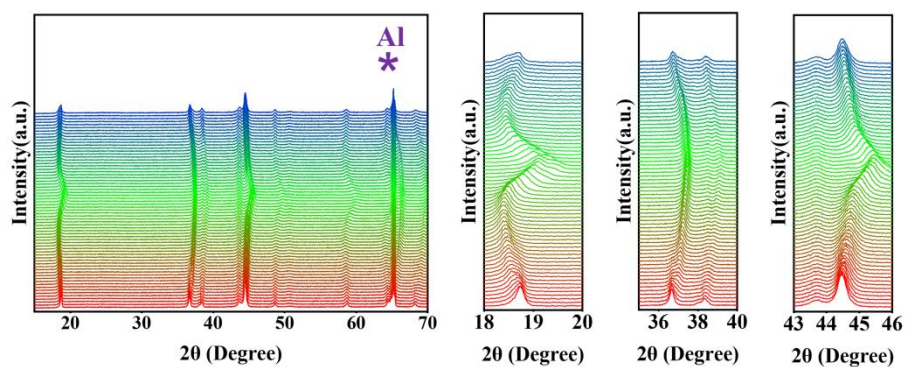

**Fig.S15** Structural evolution of NCM-1. In-situ XRD for NCM-1 cathodes during the first charge/discharge cycle between 2.8-4.4 V (vs.  $\text{Li}^+/\text{Li}$ ) at 0.08 C. The peak corresponding to the \* was the signal of the basal Al.



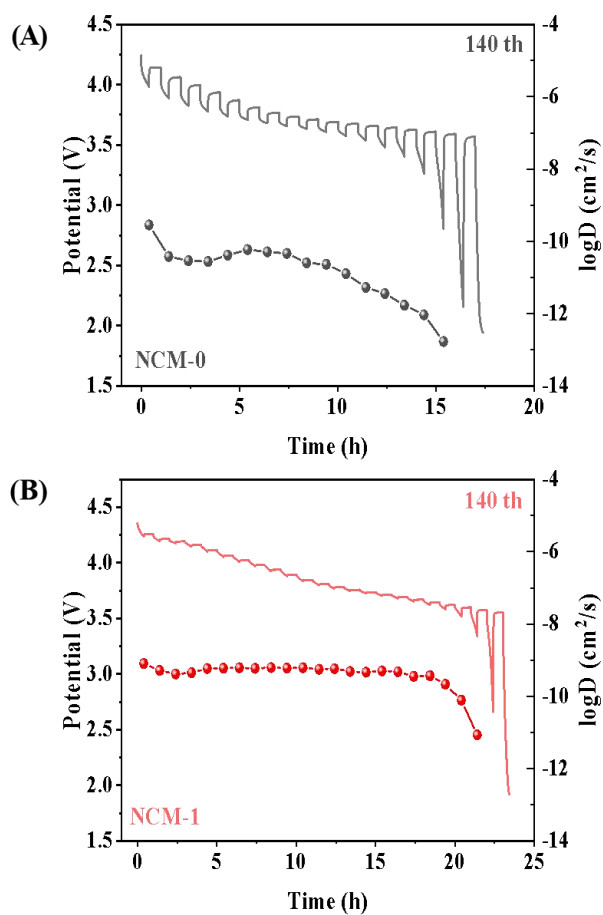

**Fig.S16** Electrochemical Performance characterizations. Charge/discharge curves of GITT at 140<sup>th</sup> cycle for (A) NCM-0 and (B) NCM-1 in the range of 2.8-4.4 V (vs. Li<sup>+</sup>/Li) at 25 °C.

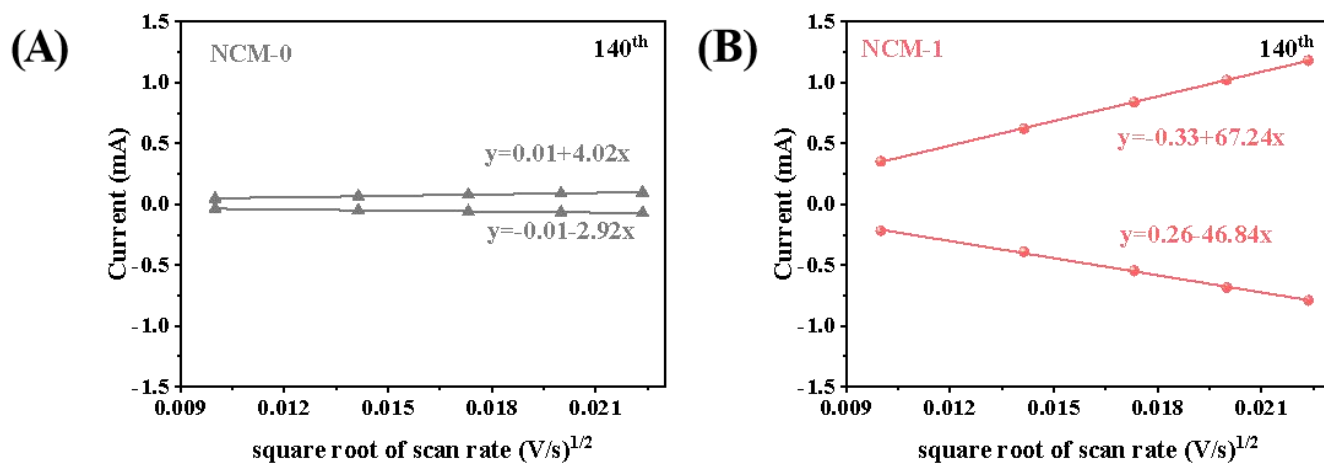

**Fig.S17** Lines plot of cathodic/anodic peak current densities with the square root of scan rate of (A) NCM-0 and (B) NCM-1 at the 140th.

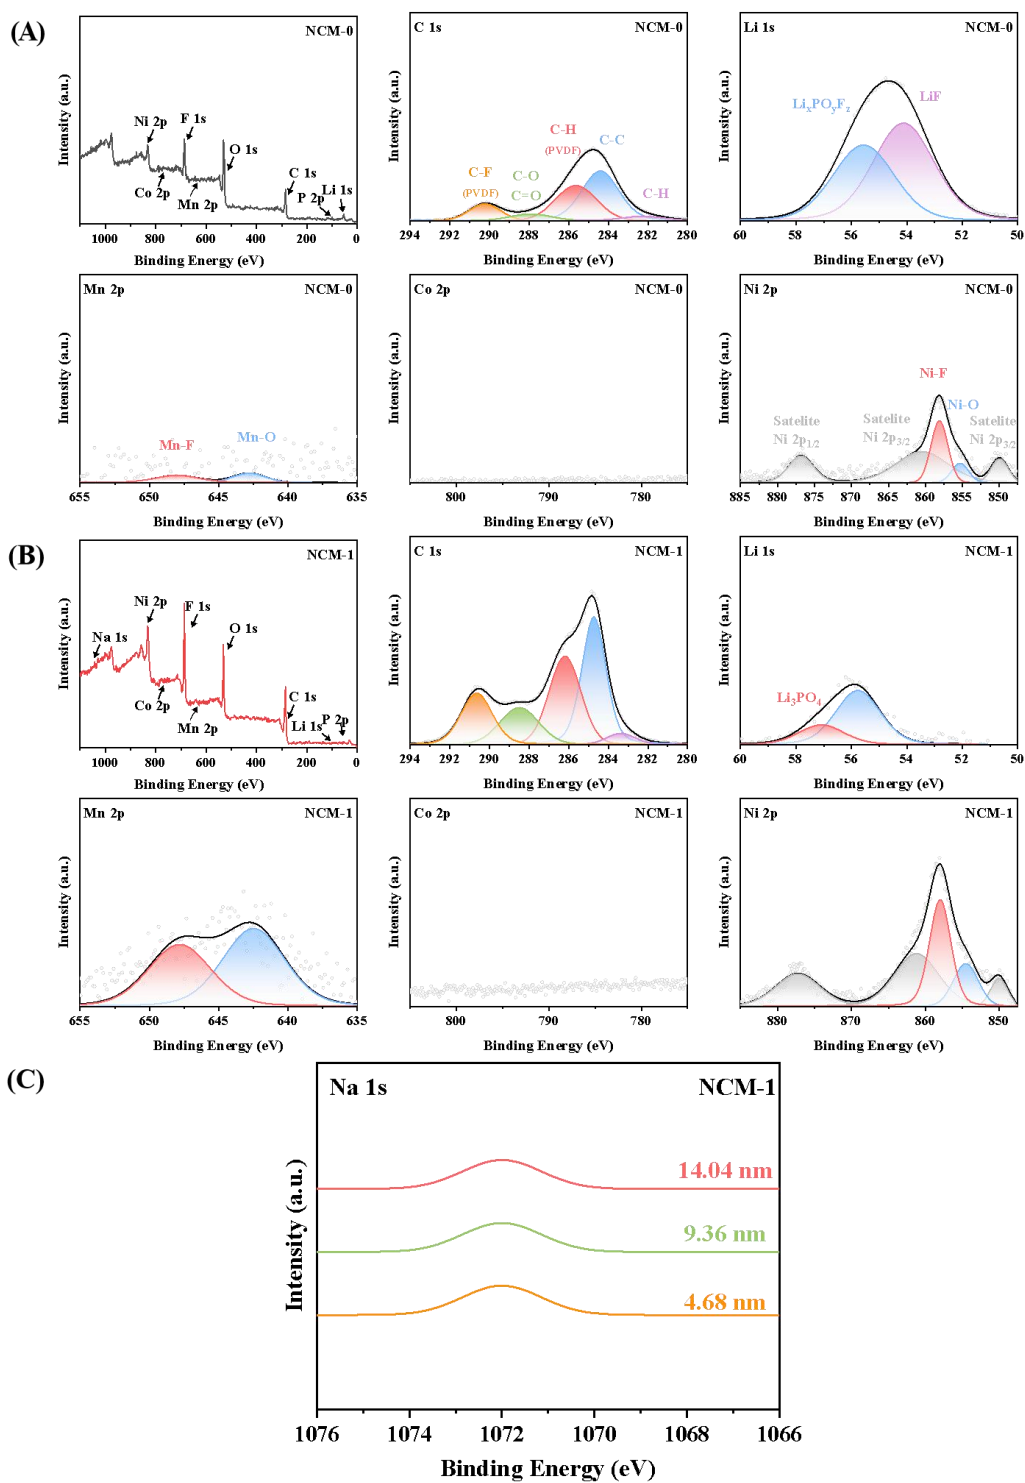

**Fig.S18** Surface composition characterization. XPS spectra of Su 1s, C 1s, Li 1s, Mn 2p, Co 2p and Ni 2p of (A) NCM-0 and (B) NCM-1 at the 140<sup>th</sup>. (C) The deep profile curve of Na for NCM-1.

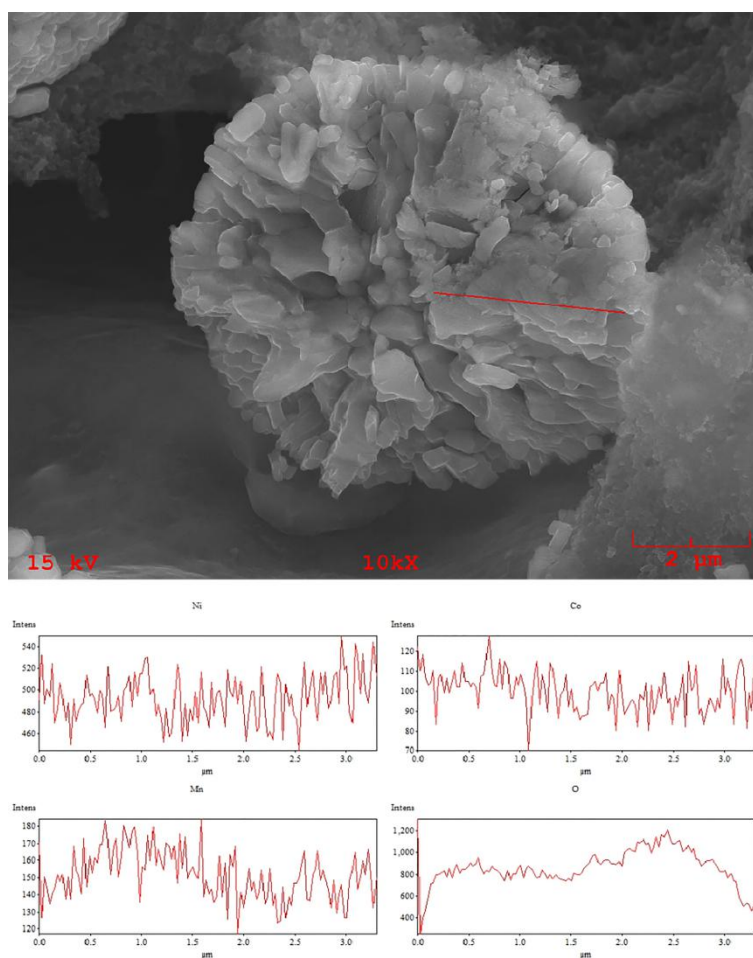

**Fig.S19** Structural characterization of NCM-0. Cross-sectional SEM images of NCM-0 at the 280<sup>th</sup> and the content of the O, Mn, Co and Ni elements distribute along the bulk to the surface.

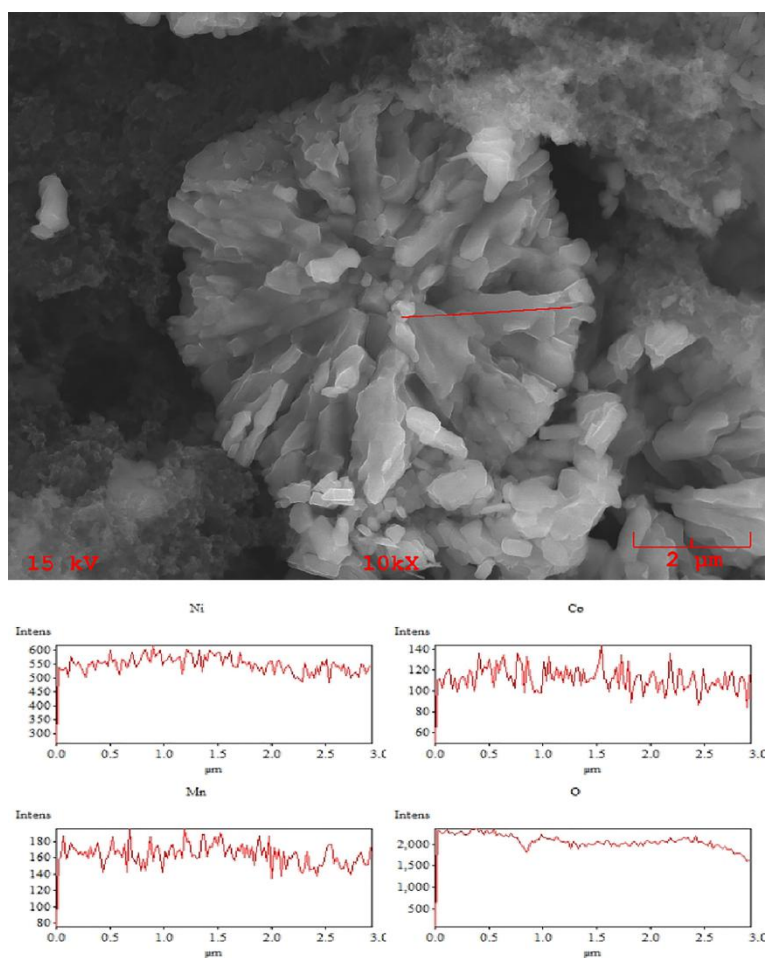

**Fig.S20** Structural characterization of NCM-1. Cross-sectional SEM images of NCM-1 at the 280<sup>th</sup> and the content of the O, Mn, Co and Ni elements distribute along the bulk to the surface.

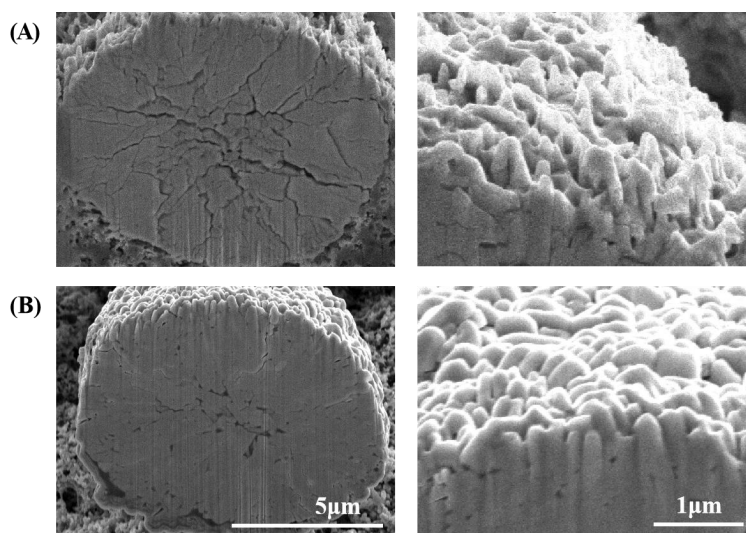

**Fig.S21** Structural characterization. Cross-sectional SEM images of (A) NCM-0 and (B) NCM-1 at the 280<sup>th</sup> and the corresponding the morphology of the particle surface (samples were prepared through a focused ion beam).

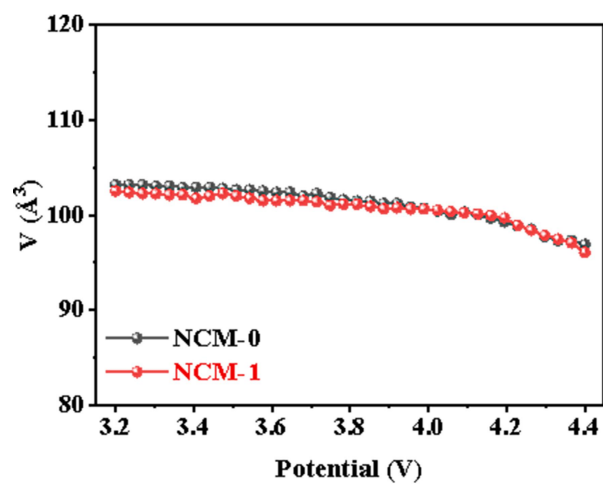

**Fig.S22** The change of cell volume  $V$  of NCM-0 and NCM-1 cathodes during the first charge between 2.8-4.4 V (vs.  $\text{Li}^+/\text{Li}$ ) at 25  $^\circ\text{C}$ .

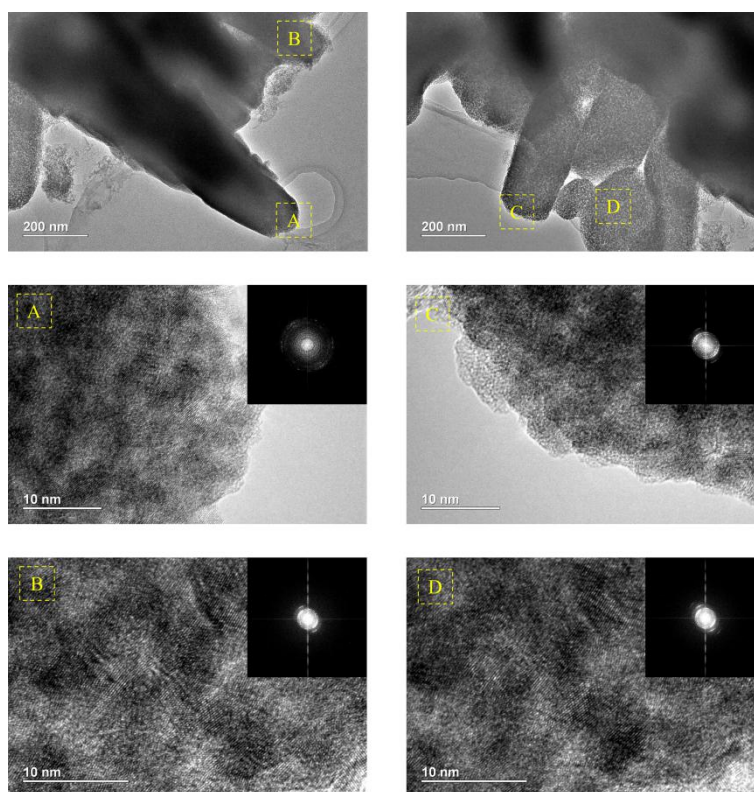

**Fig.S23** Structural characterization. TEM images of NCM-0 at the 140<sup>th</sup> with the magnification of the A, B, C and D region and the corresponding FFT pattern (inset).



## Supporting Tables

**Table S1** Comparison of cycle number and capacity retention for reported modification of layer oxide cathode materials<sup>3-8</sup> and this work.

|                                                          | C-Rate<br>(C) | Voltage<br>(V) | Capacity retention (%) | Electrolyte             | Reference |
|----------------------------------------------------------|---------------|----------------|------------------------|-------------------------|-----------|
|                                                          |               |                | 100.0 (at 50 cycles)   |                         |           |
|                                                          |               |                | 99.3 (at 100 cycles)   | 0.8 M LiPF <sub>6</sub> |           |
| NCM811-Na <sub>2</sub> PO <sub>3</sub> F                 | 1             | 4.4            | 94.4 (at 200 cycles)   | 0.4 M LiDFOB            | This work |
|                                                          |               |                | 90.0 (at 300 cycles)   | EC/EMC/FEC              |           |
|                                                          |               |                | 83.3 (at 400 cycles)   |                         |           |
| NCM811-Li <sub>n</sub> (TM) <sub>m</sub> PO <sub>4</sub> | 1             | 4.5            | 80.4 (at 300 cycles)   | 1 M LiPF <sub>6</sub>   | [3]       |
|                                                          |               |                | 87.0 (at 200 cycles)   | EC/DEC/DMC              |           |
| NCM811-Li <sub>3</sub> PO <sub>4</sub>                   | 1             | 4.3            | 86.7 (at 200 cycles)   | 1 M LiPF <sub>6</sub>   | [4]       |
|                                                          |               |                |                        | EC/EMC/DMC              |           |
| NCM811-LaPO <sub>4</sub>                                 | 1             | 4.3            | 91.2 (at 100 cycles)   | -                       | [5]       |
| NCM811-F                                                 | 2             | 4.3            | 94.3 (at 100 cycles)   | 1 M LiPF <sub>6</sub>   | [6]       |
|                                                          |               |                |                        | EC/EMC/DMC              |           |
| NCM532-Na                                                | -             | 4.25           | 97.8 (at 50 cycles)    | 1 M LiPF <sub>6</sub>   | [7]       |
|                                                          |               |                |                        | EC/DMC                  |           |
| LNM120206-F Na&F                                         | 1             | 4.8            | 82.0 (at 100 cycles)   | 1 M LiPF <sub>6</sub>   | [8]       |
|                                                          |               |                |                        | EC/DMC                  |           |
| LNM120206-Na                                             | 1             | 4.8            | 91.0 (at 100 cycles)   | 1 M LiPF <sub>6</sub>   | [8]       |
|                                                          |               |                |                        | EC/DMC                  |           |
| LNM120206-Na&F                                           | 1             | 4.8            | 93.0 (at 100 cycles)   | 1 M LiPF <sub>6</sub>   | [8]       |
|                                                          |               |                |                        | EC/DMC                  |           |

**Table S2** The  $R_e$  and  $R_{sf}$  of the NCM-0 and NCM-1 measured by EIS.

| Number | $R_e$ ( $\Omega$ ) | $R_{sf}$ ( $\Omega$ ) | $\sigma$ |
|--------|--------------------|-----------------------|----------|
| NCM-0  | 36.04              | 112.80                | 6.77     |
| NCM-1  | 23.87              | 59.81                 | 35.93    |

The EIS results is commonly divide into three regions: (i) a intercept in the high frequency region relates to the electrolyte resistance ( $R_e$ ); (ii) a semicircle in the high frequency region represents to the the surface-film resistance ( $R_{sf}$ ); (iii) a semicircle in the intermediate frequency region relates to the charge transfer impedance ( $R_{ct}$ ) of the Li-ion/electron at the interface between the electrolyte and the positive electrode material; (iiii) a sloping line in the low frequency region corresponds to the Warburg impedance relates to the diffusion movement of Li-ions inside the positive electrode material.<sup>9, 10</sup>

**Table S3** The oxidation and reduction peak current of the NCM-0 and NCM-1 with a scan rate of 0.1-0.5 mV s<sup>-1</sup>, and corresponding lithium-ion diffusion coefficient.

| Number                           | NCM-0<br>Oxidation | NCM-0<br>Reduction | NCM-1<br>Oxidation | NCM-1<br>Reduction |
|----------------------------------|--------------------|--------------------|--------------------|--------------------|
| $I_p$<br>at 0.1mVs <sup>-1</sup> | 0.60               | -0.37              | 0.90               | -0.58              |
| $I_p$<br>at 0.2mVs <sup>-1</sup> | 1.09               | -0.69              | 1.70               | -1.07              |
| $I_p$<br>at 0.3mVs <sup>-1</sup> | 1.53               | -0.96              | 2.40               | -1.50              |
| $I_p$<br>at 0.4mVs <sup>-1</sup> | 1.87               | -1.20              | 2.96               | -1.84              |
| $I_p$<br>at 0.5mVs <sup>-1</sup> | 2.18               | -1.41              | 3.46               | -2.14              |
| $I_p/v^{1/2}$                    | 128.91             | -83.96             | 208.11             | -127.17            |
| $D_{Li^+}$                       | 6.92E-10           | 2.94E-10           | 1.80E-09           | 6.74E-10           |

CV observed the behavior of the  $D_{Li^+}$ (cm<sup>2</sup> s<sup>-1</sup>) during the different scan rates.<sup>9</sup> According to the plot of CV scan rates  $v^{1/2}$  (mV s<sup>-1</sup>)<sup>1/2</sup> versus the peak current  $I_p$  (mA),  $D_{Li^+}$  of samples are estimated as below (2):<sup>11</sup>

$$I_p = 2.69 \times 10^5 \times n^{3/2} \times A \times D_{Li^+}^{1/2} \times v^{1/2} \times C_0 \quad (2)$$

Where  $n$  is the number of electrons in the Li<sup>+</sup> ( $n = 1$ ),  $A$  is the electrode area ( $A = 1.131$  cm<sup>2</sup>), and  $C_0$  is the initial concentration of Li<sup>+</sup> in the cathode ( $C_0 = 0.018$  mol cm<sup>-3</sup>).

**Table S4** The relative composition of Li and TM (Ni/Mn/Co) in the NCM-0 and NCM-1.

| Number | Li     | TM     | Li/TM |
|--------|--------|--------|-------|
| NCM-0  | 10.650 | 10.392 | 1.025 |
| NCM-1  | 10.581 | 10.482 | 1.009 |

**Table S5** Crystallographic and refined XRD data of NCM-0, NCM-0.05, NCM-0.33, NCM-1 and NCM-3.

| Number            | NCM-0   | NCM-0.05 | NCM-0.33 | NCM-1   | NCM-3   |
|-------------------|---------|----------|----------|---------|---------|
| $a[\text{\AA}]$   | 2.873   | 2.873    | 2.874    | 2.874   | 2.878   |
| $c[\text{\AA}]$   | 14.184  | 14.201   | 14.212   | 14.215  | 14.227  |
| $c/a$             | 4.937   | 4.946    | 4.945    | 4.946   | 4.944   |
| $V[\text{\AA}^3]$ | 101.386 | 101.534  | 101.659  | 101.692 | 102.014 |
| $I_{(003)/(104)}$ | 1.246   | 1.256    | 1.258    | 1.291   | 1.209   |
| Ni at Li site (%) | 3.72    | 3.64     | 3.44     | 2.27    | 4.46    |
| $R_{wp}$ (%)      | 8.3     | 7.5      | 8.6      | 7       | 6.8     |

**Table S6** Refined XRD data for NCM-0.

| Element | Site | x | y | z     | Occupancy |
|---------|------|---|---|-------|-----------|
| Li      | (3a) | 0 | 0 | 0     | 0.963     |
| Ni      | (3a) | 0 | 0 | 0     | 0.037     |
| Ni      | (3b) | 0 | 0 | 0.5   | 0.763     |
| Co      | (3b) | 0 | 0 | 0.5   | 0.100     |
| Mn      | (3b) | 0 | 0 | 0.5   | 0.100     |
| Li      | (3b) | 0 | 0 | 0.5   | 0.037     |
| O       | (6c) | 0 | 0 | 0.242 | 2.000     |

**Table S7** Refined XRD data for NCM-0.05 (Since the content of Na<sub>2</sub>PO<sub>3</sub>F was too small, the effect of Na and F elements on the crystal structure of the NCM was ignored during the refined).

| Element | Site | x | y | z     | Occupancy |
|---------|------|---|---|-------|-----------|
| Li      | (3a) | 0 | 0 | 0     | 0.964     |
| Ni      | (3a) | 0 | 0 | 0     | 0.036     |
| Na      | (3a) | 0 | 0 | 0     | <0.001    |
| Ni      | (3b) | 0 | 0 | 0.5   | 0.764     |
| Co      | (3b) | 0 | 0 | 0.5   | 0.100     |
| Mn      | (3b) | 0 | 0 | 0.5   | 0.100     |
| Li      | (3b) | 0 | 0 | 0.5   | 0.036     |
| O       | (6c) | 0 | 0 | 0.243 | 2.000     |
| F       | (6c) | 0 | 0 | 0.243 | <0.001    |

**Table S8** Refined XRD data for NCM-0.33.

| Element | Site | x | y | z     | Occupancy |
|---------|------|---|---|-------|-----------|
| Li      | (3a) | 0 | 0 | 0     | 0.957     |
| Ni      | (3a) | 0 | 0 | 0     | 0.034     |
| Na      | (3a) | 0 | 0 | 0     | 0.009     |
| Ni      | (3b) | 0 | 0 | 0.5   | 0.766     |
| Co      | (3b) | 0 | 0 | 0.5   | 0.100     |
| Mn      | (3b) | 0 | 0 | 0.5   | 0.100     |
| Li      | (3b) | 0 | 0 | 0.5   | 0.034     |
| O       | (6c) | 0 | 0 | 0.242 | 1.996     |
| F       | (6c) | 0 | 0 | 0.242 | 0.004     |



**Table S9** Refined XRD data for NCM-1.

| Element | Site | x | y | z     | Occupancy |
|---------|------|---|---|-------|-----------|
| Li      | (3a) | 0 | 0 | 0     | 0.964     |
| Ni      | (3a) | 0 | 0 | 0     | 0.023     |
| Na      | (3a) | 0 | 0 | 0     | 0.013     |
| Ni      | (3b) | 0 | 0 | 0.5   | 0.777     |
| Co      | (3b) | 0 | 0 | 0.5   | 0.100     |
| Mn      | (3b) | 0 | 0 | 0.5   | 0.100     |
| Li      | (3b) | 0 | 0 | 0.5   | 0.023     |
| O       | (6c) | 0 | 0 | 0.240 | 1.992     |
| F       | (6c) | 0 | 0 | 0.240 | 0.008     |

**Table S10** Refined XRD data for NCM-3.

| Element | Site | x | y | z     | Occupancy |
|---------|------|---|---|-------|-----------|
| Li      | (3a) | 0 | 0 | 0     | 0.920     |
| Ni      | (3a) | 0 | 0 | 0     | 0.045     |
| Na      | (3a) | 0 | 0 | 0     | 0.035     |
| Ni      | (3b) | 0 | 0 | 0.5   | 0.755     |
| Co      | (3b) | 0 | 0 | 0.5   | 0.100     |
| Mn      | (3b) | 0 | 0 | 0.5   | 0.100     |
| Li      | (3b) | 0 | 0 | 0.5   | 0.045     |
| O       | (6c) | 0 | 0 | 0.240 | 1.980     |
| F       | (6c) | 0 | 0 | 0.240 | 0.020     |

**Table S11** The oxidation and reduction peak current of the NCM-0 and NCM-1 with a scan rate of 0.1-0.5 mV s<sup>-1</sup>, and corresponding lithium-ion diffusion coefficient after 140<sup>th</sup> cycle.

| Number                           | NCM-0<br>Oxidation | NCM-0<br>Reduction | NCM-1<br>Oxidation | NCM-1<br>Reduction |
|----------------------------------|--------------------|--------------------|--------------------|--------------------|
| $I_p$<br>at 0.1mVs <sup>-1</sup> | 0.05               | -0.04              | 0.35               | -0.22              |
| $I_p$<br>at 0.2mVs <sup>-1</sup> | 0.07               | -0.05              | 0.62               | -0.39              |
| $I_p$<br>at 0.3mVs <sup>-1</sup> | 0.08               | -0.06              | 0.84               | -0.55              |
| $I_p$<br>at 0.4mVs <sup>-1</sup> | 0.09               | -0.07              | 1.02               | -0.68              |
| $I_p$<br>at 0.5mVs <sup>-1</sup> | 0.10               | -0.07              | 1.18               | -0.79              |
| $I_p/v^{1/2}$                    | 4.02               | 2.92               | 67.24              | 46.84              |
| $D_{Li^+}$                       | 6.73E-13           | 3.55E-13           | 1.88E-10           | 9.14E-11           |

## References

- 1 S. Cui, Y. Wei, T. Liu, W. Deng, Z. Hu, Y. Su, H. Li, M. Li, H. Guo, Y. Duan, W. Wang, M. Rao, J. Zheng, X. Wang and F. Pan, *Adv. Energy Mater.*, 2016, **6**, 1501309-1501318.
- 2 H. Liu, Y. Yang and J. Zhang, *J. Power Sources*, 2006, **162**, 644-650.
- 3 Y. Li, L. Cui, C. Tan, X. Fan, Q. Pan, Y. Chu, S. Hu, F. Zheng, H. Wang and Q. Li, *Chem. Eng. J.*, 2022, **430**, 132985-132996.
- 4 P. Yue, Z. Wang, H. Guo, X. Xiong and X. Li, *Electrochim. Acta*, 2013, **92**, 1-8.
- 5 W. Zhang, L. Liang, F. Zhao, Y. Liu, L. Hou and C. Yuan, *Electrochim. Acta*, 2020, **340**, 135871-135881.
- 6 H. Tong, P. Dong, J. Zhang, J. Zheng, W. Yu, K. Wei, B. Zhang, Z. Liu and D. Chu, *J. Alloys Compd.*, 2018, **764**, 44-50.
- 7 R. Zhao, Z. Yang, J. Liang, D. Lu, C. Liang, X. Guan, A. Gao and H. Chen, *J. Alloys Compd.*, 2016, **689**, 318-325.
- 8 D. Liu, X. Fan, Z. Li, T. Liu, M. Sun, C. Qian, M. Ling, Y. Liu and C. Liang, *Nano Energy*, 2019, **58**, 786-796.
- 9 K. Du, H. Xie, G. Hu, Z. Peng, Y. Cao and F. Yu, *ACS Appl. Mater. Interfaces*, 2016, **8**, 17713-17720.
- 10 J. Zhang, Y. Cao, X. Ou, J. Zhang, C. Wang, C. Peng, B. Zhang and Y. Tian, *J. Power Sources*, 2019, **436**, 226722-226731.
- 11 W. Liu, X. Li, D. Xiong, Y. Hao, J. Li, H. Kou, B. Yan, D. Li, S. Lu, A. Koo, K. Adair and X. Sun, *Nano Energy*, 2018, **44**, 111-120.
